# Supplementary material for: Are spasticity, weakness, selectivity, and passive range of motion related to gait deviations in children with spastic cerebral palsy? A statistical parametric mapping study
Source: PubMed Central journal article supplement (PMC6788679; doi:10.1371/journal.pone.0223363), 2019-10-11
Supplement: pone.0223363.s001.pdf [file pone.0223363.s001.pdf]

|                           | Item No | Recommendation                                                                                                                                                                             | Included on page:           |
|---------------------------|---------|--------------------------------------------------------------------------------------------------------------------------------------------------------------------------------------------|-----------------------------|
| <b>Title and abstract</b> | 1       | (a) Indicate the study's design with a commonly used term in the title or the abstract                                                                                                     | 1                           |
|                           |         | (b) Provide in the abstract an informative and balanced summary of what was done and what was found                                                                                        | 2                           |
| <b>Introduction</b>       |         |                                                                                                                                                                                            |                             |
| Background/rationale      | 2       | Explain the scientific background and rationale for the investigation being reported                                                                                                       | 3-5                         |
| Objectives                | 3       | State specific objectives, including any pre-specified hypotheses                                                                                                                          | 5                           |
| <b>Methods</b>            |         |                                                                                                                                                                                            |                             |
| Study design              | 4       | Present key elements of study design early in the paper                                                                                                                                    | 6                           |
| Setting                   | 5       | Describe the setting, locations, and relevant dates, including periods of recruitment, exposure, follow-up, and data collection                                                            | 6                           |
| Participants              | 6       | (a) <i>Cohort study</i> —Give the eligibility criteria, and the sources and methods of selection of participants. Describe methods of follow-up                                            | 6, follow-up not applicable |
|                           |         | <i>Case-control study</i> —Give the eligibility criteria, and the sources and methods of case ascertainment and control selection. Give the rationale for the choice of cases and controls |                             |
|                           |         | <i>Cross-sectional study</i> —Give the eligibility criteria, and the sources and methods of selection of participants                                                                      |                             |
|                           |         | (b) <i>Cohort study</i> —For matched studies, give matching criteria and number of exposed and unexposed                                                                                   | Not applicable              |
|                           |         | <i>Case-control study</i> —For matched studies, give matching criteria and the number of controls per case                                                                                 |                             |
| Variables                 | 7       | Clearly define all outcomes, exposures, predictors, potential confounders, and effect modifiers. Give diagnostic criteria, if applicable                                                   | 6-11                        |
| Data sources/measurement  | 8*      | For each variable of interest, give sources of data and details of methods of assessment (measurement). Describe comparability of assessment methods if there is more than one group       | 6-11                        |
| Bias                      | 9       | Describe any efforts to address potential sources of bias                                                                                                                                  | Not performed               |
| Study size                | 10      | Explain how the study size was arrived at                                                                                                                                                  | 6                           |
| Quantitative variables    | 11      | Explain how quantitative variables were handled in the analyses. If applicable, describe which groupings were chosen and why                                                               | 6-11                        |
| Statistical methods       | 12      | (a) Describe all statistical methods, including those used to control for confounding                                                                                                      | 10-11                       |
|                           |         | (b) Describe any methods used to examine subgroups and interactions                                                                                                                        | 10-11                       |
|                           |         | (c) Explain how missing data were addressed                                                                                                                                                | Not                         |

|                   |     |                                                                                                                                                                                                              |                                             |
|-------------------|-----|--------------------------------------------------------------------------------------------------------------------------------------------------------------------------------------------------------------|---------------------------------------------|
|                   |     |                                                                                                                                                                                                              | applicable                                  |
|                   |     | (d) <i>Cohort study</i> —If applicable, explain how loss to follow-up was addressed                                                                                                                          | Not applicable                              |
|                   |     | <i>Case-control study</i> —If applicable, explain how matching of cases and controls was addressed                                                                                                           | Not applicable                              |
|                   |     | <i>Cross-sectional study</i> —If applicable, describe analytical methods taking account of sampling strategy                                                                                                 | Not applicable                              |
|                   |     | (e) Describe any sensitivity analyses                                                                                                                                                                        | Not applicable                              |
| <b>Results</b>    |     |                                                                                                                                                                                                              |                                             |
| Participants      | 13* | (a) Report numbers of individuals at each stage of study—eg numbers potentially eligible, examined for eligibility, confirmed eligible, included in the study, completing follow-up, and analysed            | p. 6, Table 1                               |
|                   |     | (b) Give reasons for non-participation at each stage                                                                                                                                                         | Not applicable                              |
|                   |     | (c) Consider use of a flow diagram                                                                                                                                                                           | Not relevant                                |
| Descriptive data  | 14* | (a) Give characteristics of study participants (eg demographic, clinical, social) and information on exposures and potential confounders                                                                     | p. 6, Table 1                               |
|                   |     | (b) Indicate number of participants with missing data for each variable of interest                                                                                                                          | Not applicable                              |
|                   |     | (c) <i>Cohort study</i> —Summarise follow-up time (eg, average and total amount)                                                                                                                             | Not applicable                              |
| Outcome data      | 15* | <i>Cohort study</i> —Report numbers of outcome events or summary measures over time                                                                                                                          | Table 1                                     |
|                   |     | <i>Case-control study</i> —Report numbers in each exposure category, or summary measures of exposure                                                                                                         | Not applicable                              |
|                   |     | <i>Cross-sectional study</i> —Report numbers of outcome events or summary measures                                                                                                                           | Not applicable                              |
| Main results      | 16  | (a) Give unadjusted estimates and, if applicable, confounder-adjusted estimates and their precision (eg, 95% confidence interval). Make clear which confounders were adjusted for and why they were included | p. 12-30, including Tables 2-5 and Figs 3-7 |
|                   |     | (b) Report category boundaries when continuous variables were categorized                                                                                                                                    | Not performed                               |
|                   |     | (c) If relevant, consider translating estimates of relative risk into absolute risk for a meaningful time period                                                                                             | Not applicable                              |
| Other analyses    | 17  | Report other analyses done—eg analyses of subgroups and interactions, and sensitivity analyses                                                                                                               | p. 12, Table 1                              |
| <b>Discussion</b> |     |                                                                                                                                                                                                              |                                             |
| Key results       | 18  | Summarise key results with reference to study objectives                                                                                                                                                     | 30-38                                       |
| Limitations       | 19  | Discuss limitations of the study, taking into account sources of potential bias or imprecision. Discuss both direction and magnitude of any potential bias                                                   | 38-40                                       |

|                          |    |                                                                                                                                                                            |                  |
|--------------------------|----|----------------------------------------------------------------------------------------------------------------------------------------------------------------------------|------------------|
| Interpretation           | 20 | Give a cautious overall interpretation of results considering objectives, limitations, multiplicity of analyses, results from similar studies, and other relevant evidence | 40-41            |
| Generalisability         | 21 | Discuss the generalisability (external validity) of the study results                                                                                                      | Not performed    |
| <b>Other information</b> |    |                                                                                                                                                                            |                  |
| Funding                  | 22 | Give the source of funding and the role of the funders for the present study and, if applicable, for the original study on which the present article is based              | Submitted online |
