# Supplementary material for: Are spasticity, weakness, selectivity, and passive range of motion related to gait deviations in children with spastic cerebral palsy? A statistical parametric mapping study
Source: PubMed Central journal article supplement (PMC6788679; doi:10.1371/journal.pone.0223363), 2019-10-11

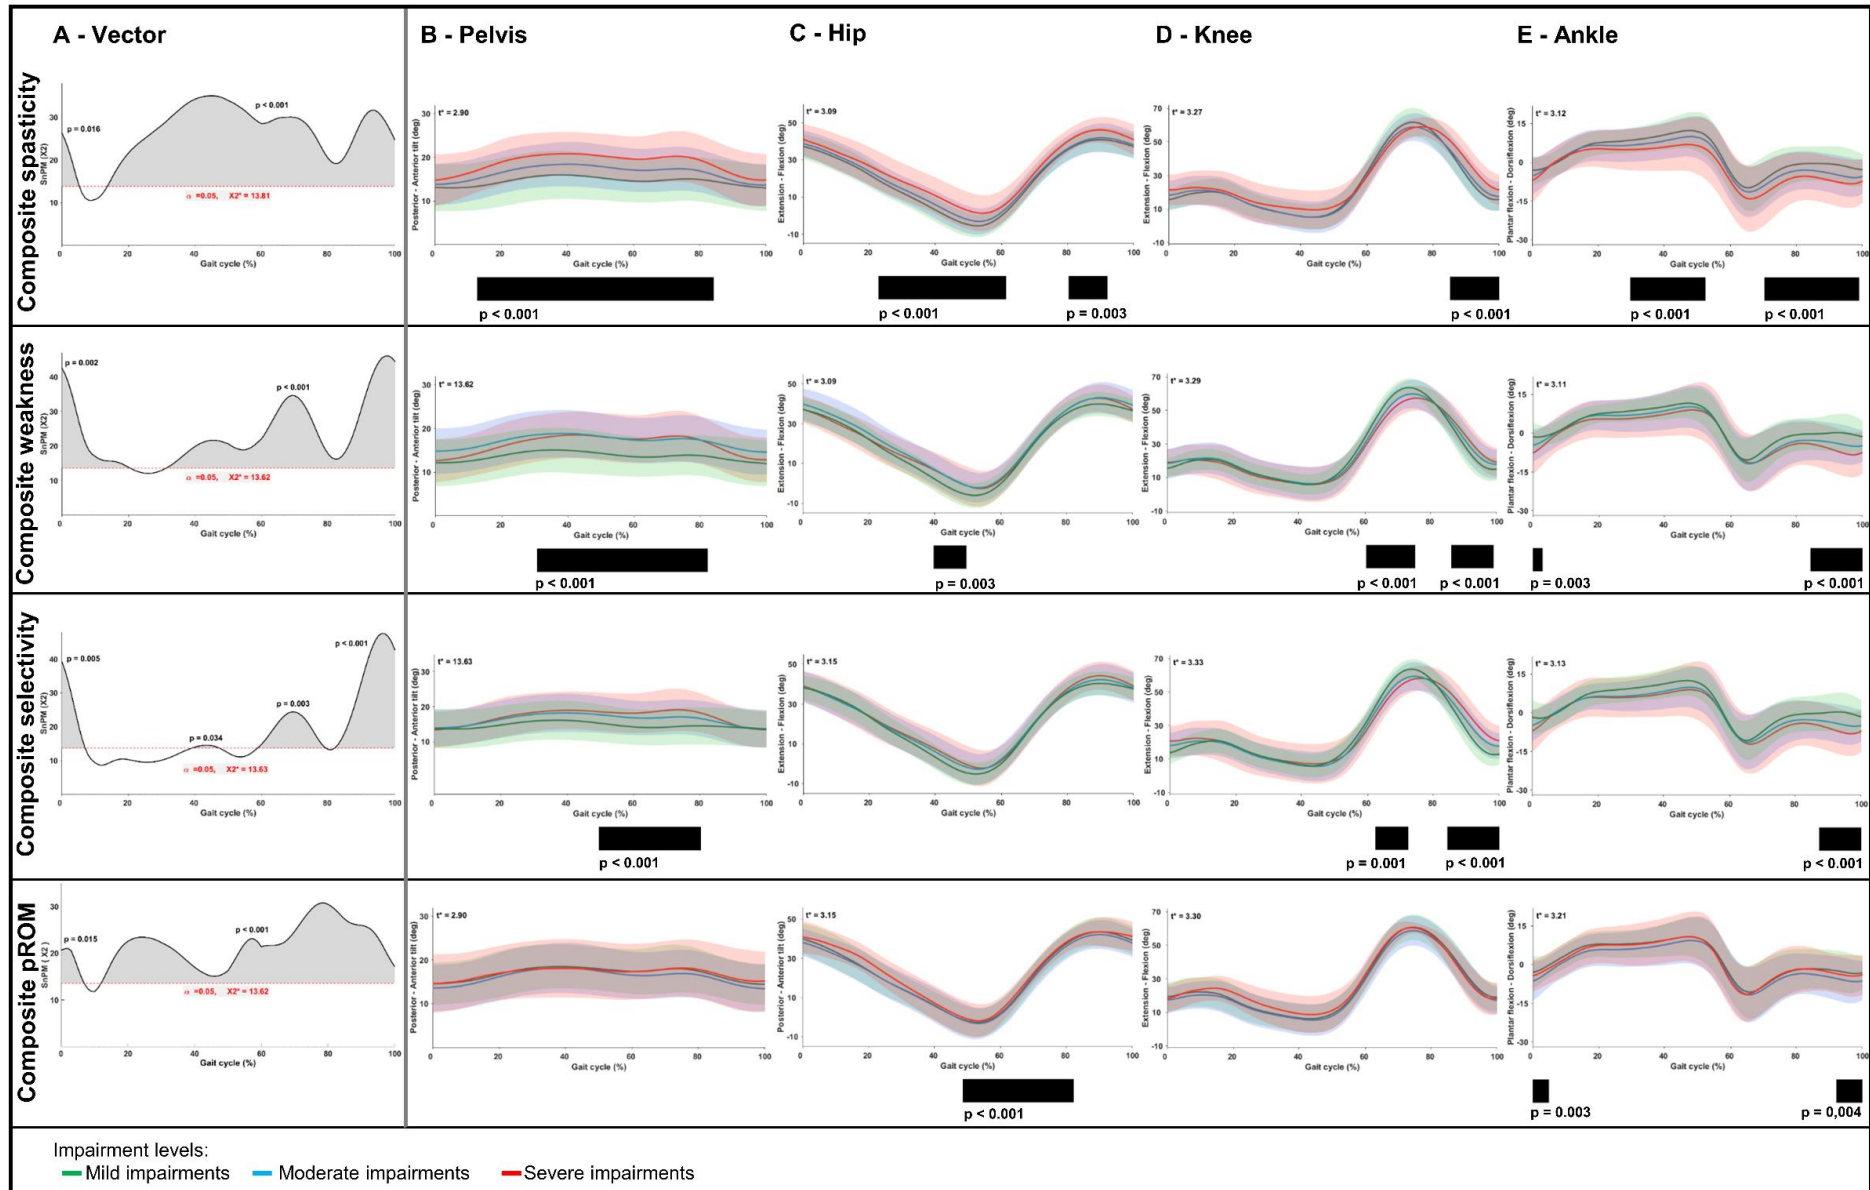

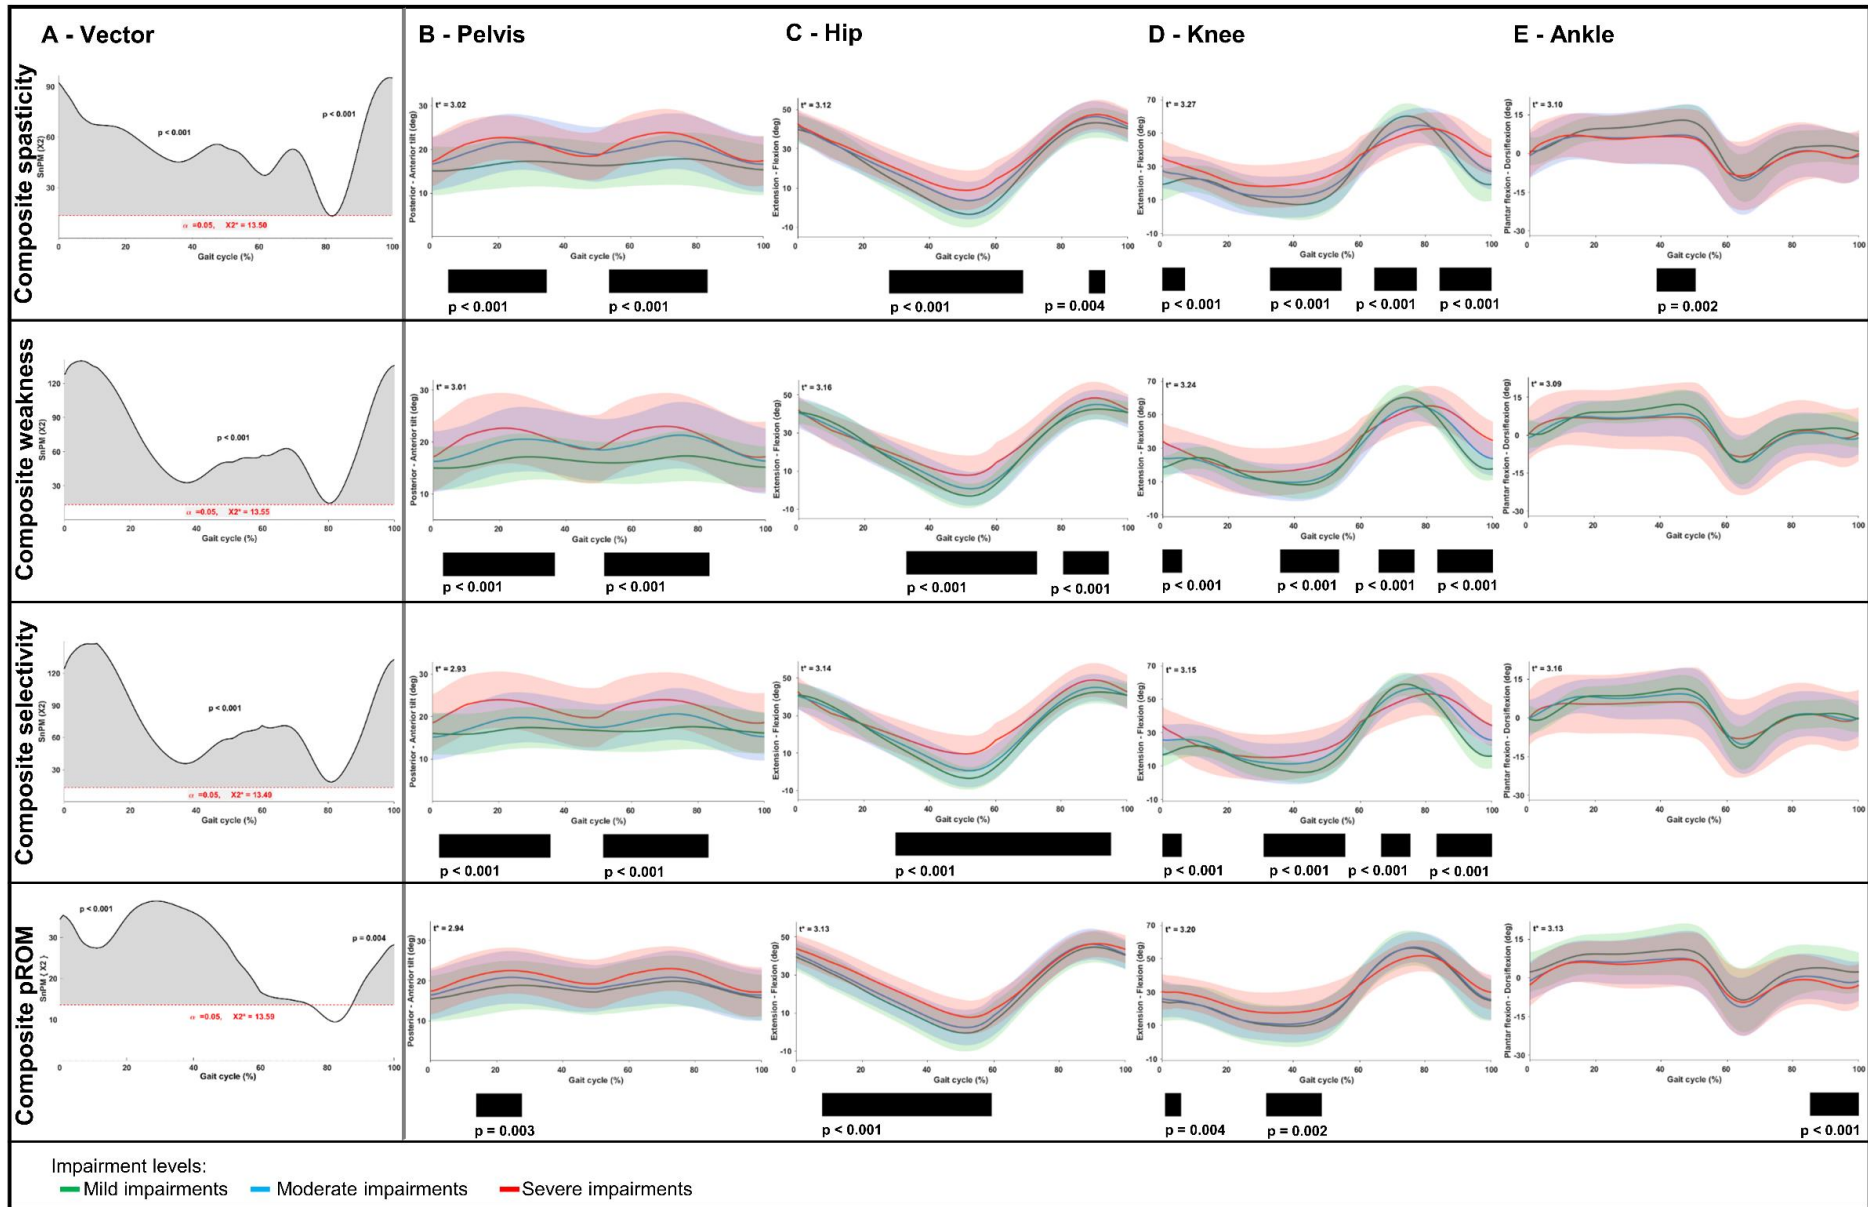

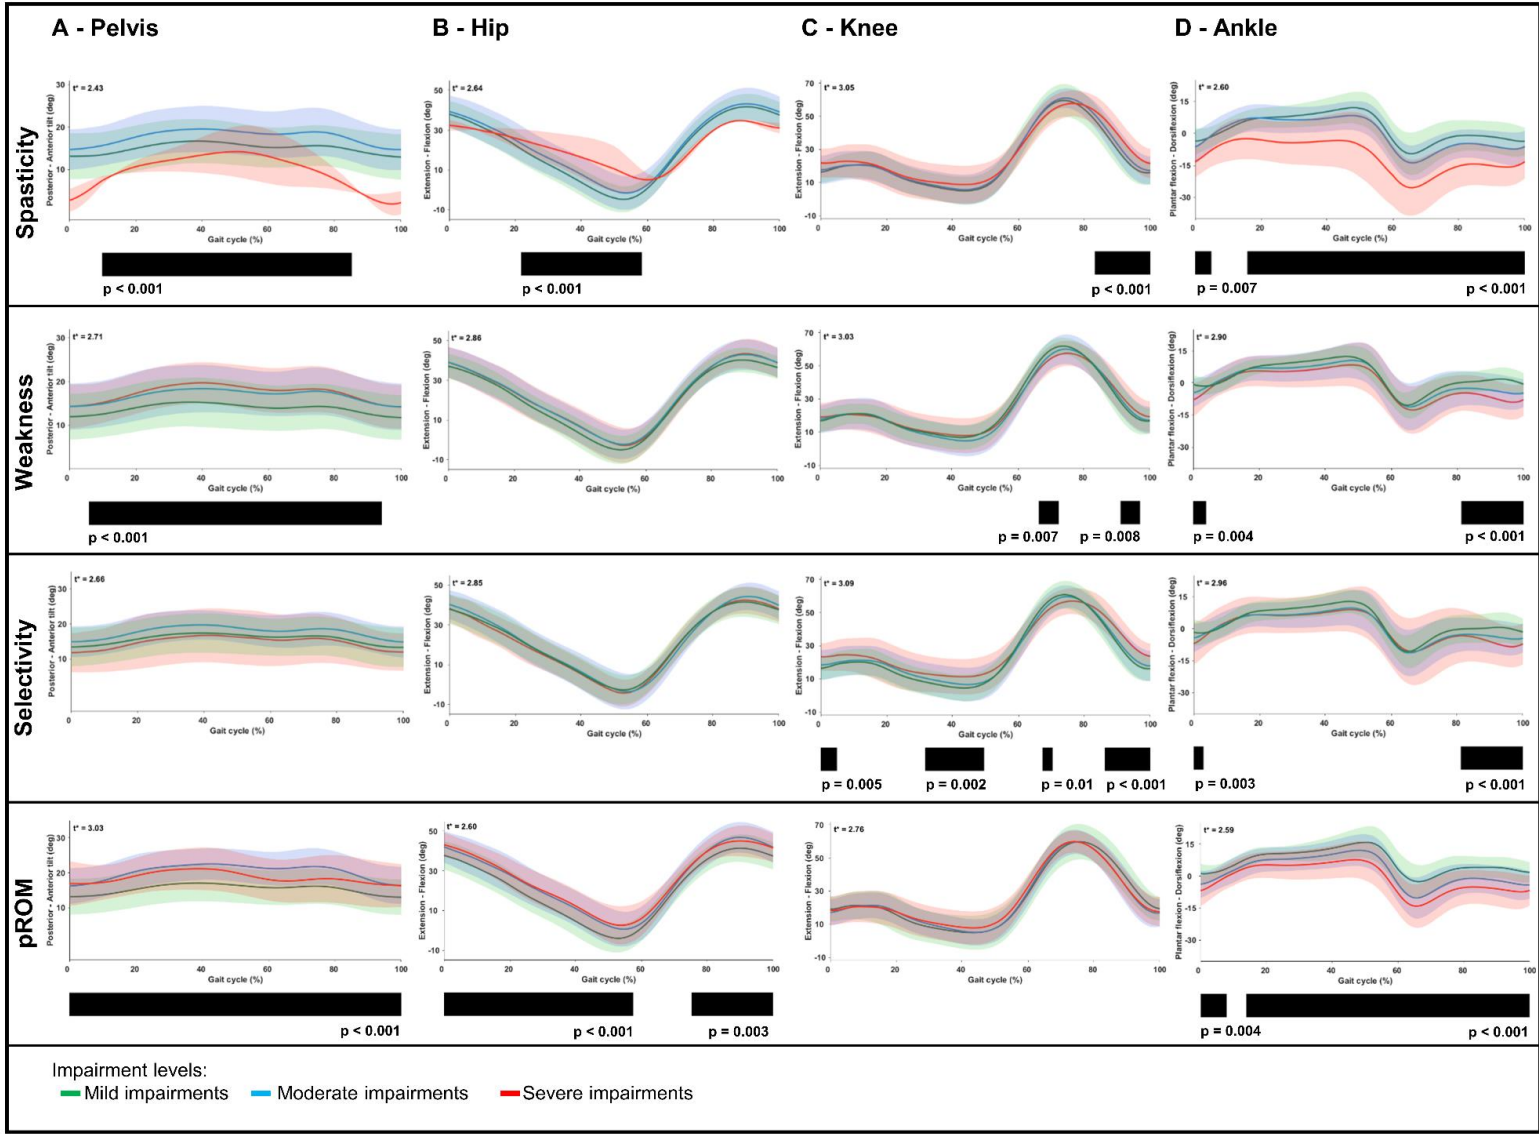

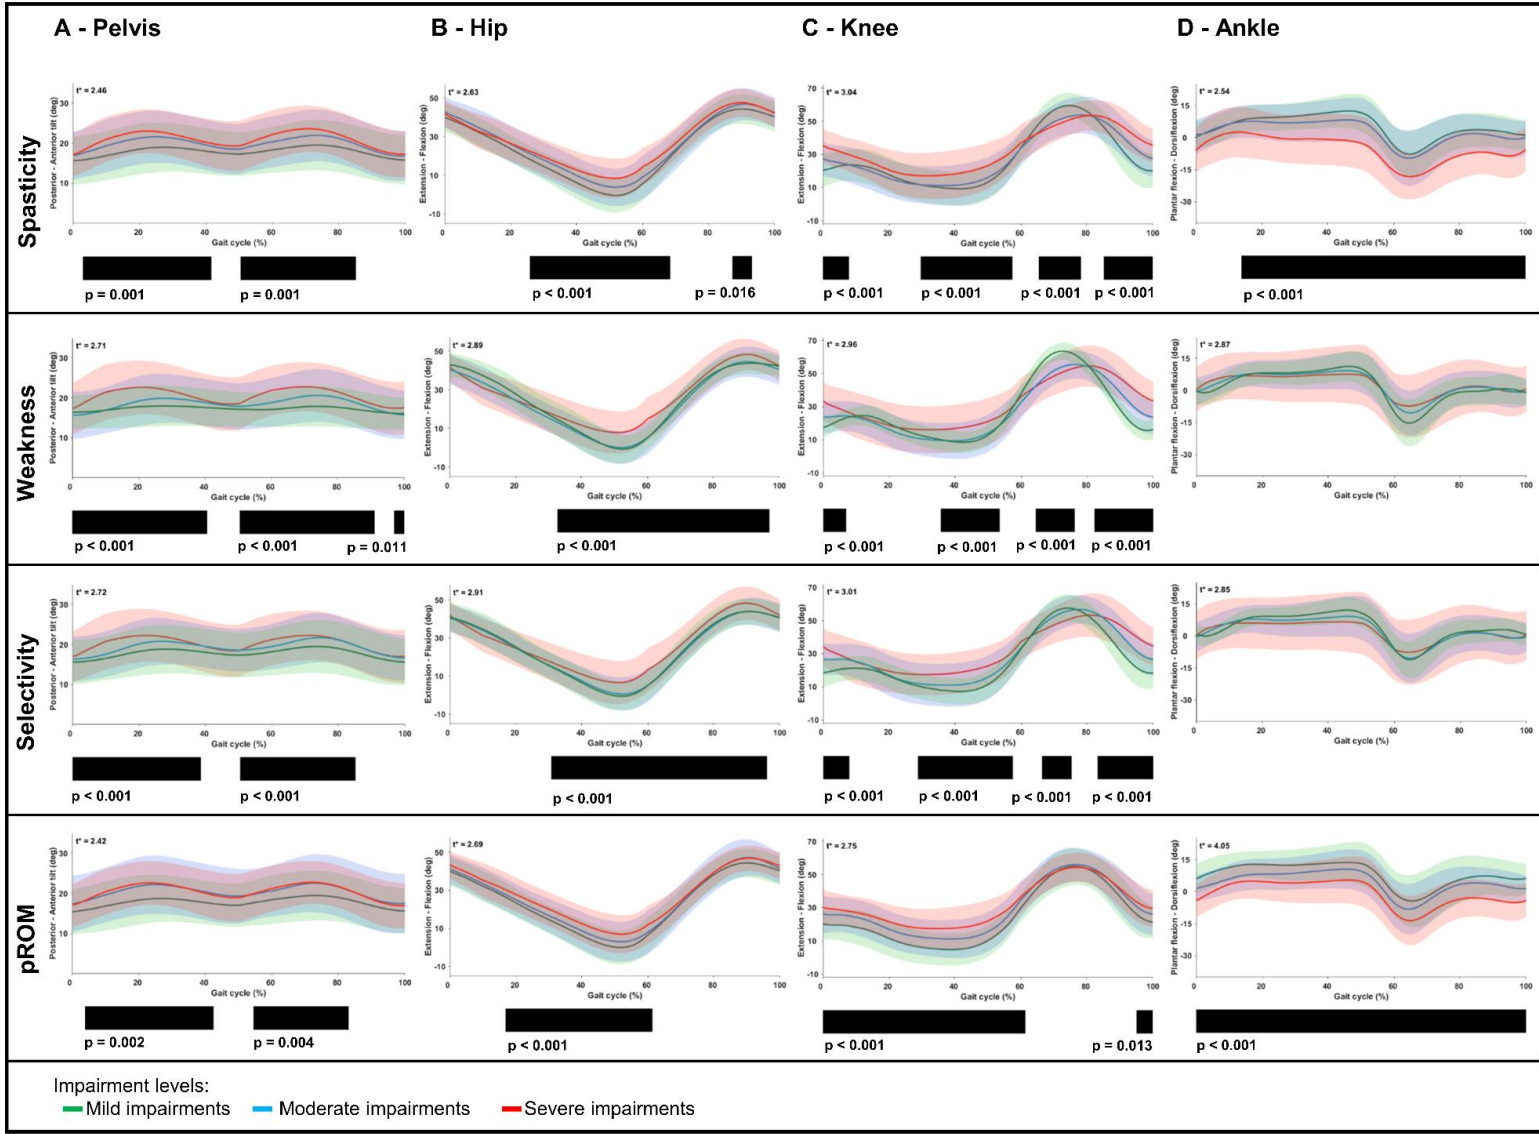

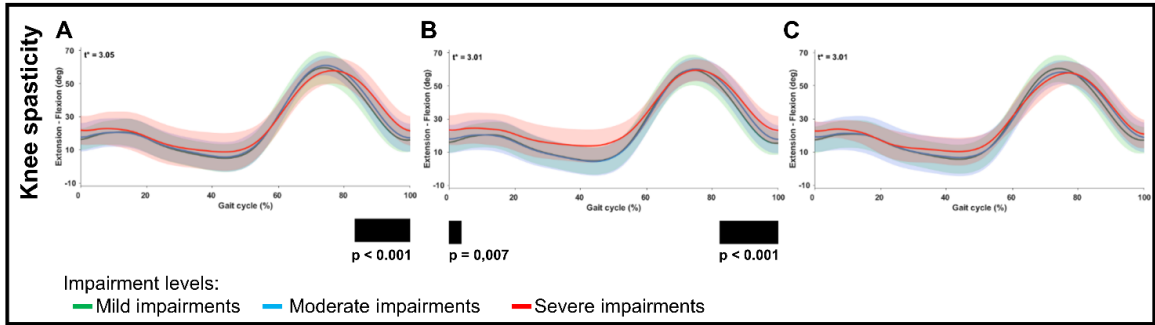

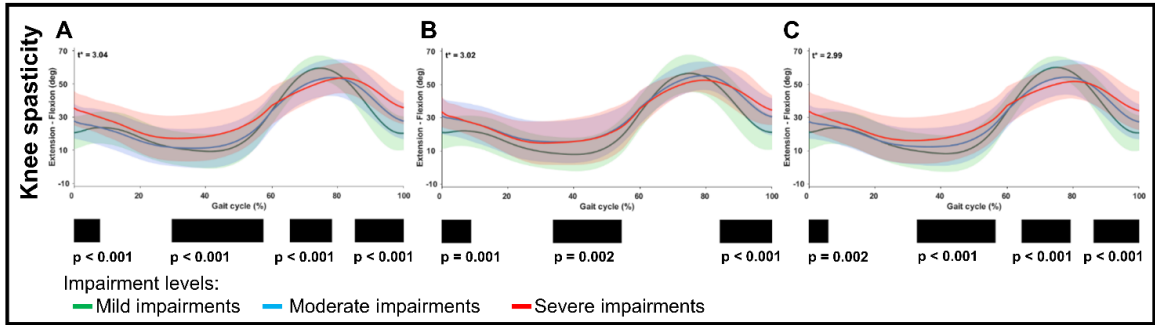

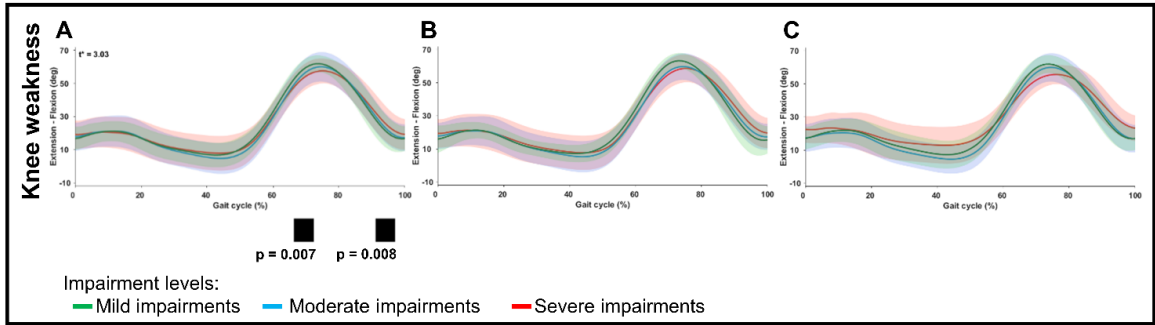



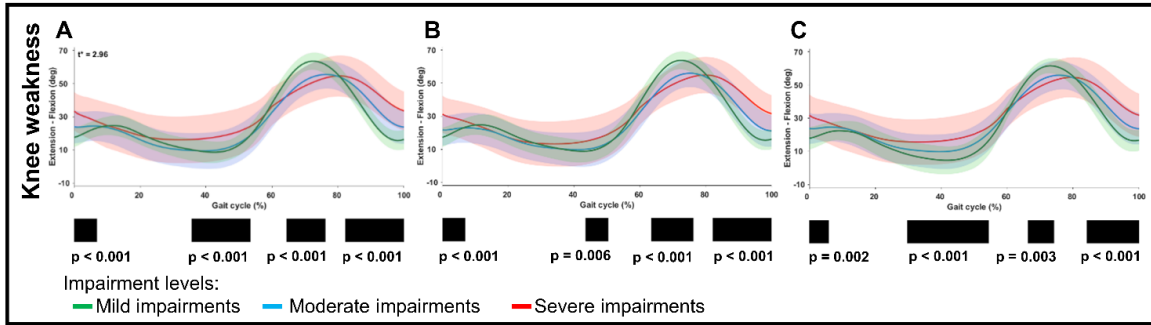

Supplement: pone.0223363.s002.pdf [file pone.0223363.s002.pdf]
