# Supplementary material for: Are spasticity, weakness, selectivity, and passive range of motion related to gait deviations in children with spastic cerebral palsy? A statistical parametric mapping study
Source: PubMed Central journal article supplement (PMC6788679; doi:10.1371/journal.pone.0223363), 2019-10-11
Supplement: pone.0223363.s003.pdf [file pone.0223363.s003.pdf]

|     |                       | Composite spasticity | Composite weakness | Composite selectivity | Composite pROM |
|-----|-----------------------|----------------------|--------------------|-----------------------|----------------|
| uCP | Composite spasticity  |                      |                    |                       |                |
|     | Composite weakness    | -0.39*               |                    |                       |                |
|     | Composite selectivity | -0.41*               | 0.83*              |                       |                |
|     | Composite pROM        | 0.46*                |                    |                       |                |
| bCP | Composite spasticity  |                      |                    |                       |                |
|     | Composite weakness    | -0.57*               |                    |                       |                |
|     | Composite selectivity | -0.60*               | 0.90*              |                       |                |
|     | Composite pROM        | 0.53*                |                    |                       |                |

|                          | Joint spasticity scores |       |       | Joint weakness scores |       |       | Joint selectivity scores |       |       | Joint pROM scores |      |       |
|--------------------------|-------------------------|-------|-------|-----------------------|-------|-------|--------------------------|-------|-------|-------------------|------|-------|
|                          | Hip                     | Knee  | Ankle | Hip                   | Knee  | Ankle | Hip                      | Knee  | Ankle | Hip               | Knee | Ankle |
| Joint spasticity scores  |                         |       |       |                       |       |       |                          |       |       |                   |      |       |
| Hip                      |                         |       |       |                       |       |       |                          |       |       |                   |      |       |
| Knee                     | 0.31*                   |       |       |                       |       |       |                          |       |       |                   |      |       |
| Ankle                    |                         |       |       |                       |       |       |                          |       |       |                   |      |       |
| Joint weakness scores    |                         |       |       |                       |       |       |                          |       |       |                   |      |       |
| Hip                      |                         |       |       |                       |       |       |                          |       |       |                   |      |       |
| Knee                     | 0.32*                   |       |       | 0.50*                 |       |       |                          |       |       |                   |      |       |
| Ankle                    |                         | 0.35* |       | 0.39*                 | 0.53* |       |                          |       |       |                   |      |       |
| Joint selectivity scores |                         |       |       |                       |       |       |                          |       |       |                   |      |       |
| Hip                      |                         |       |       | 0.51*                 |       | 0.36* |                          |       |       |                   |      |       |
| Knee                     | 0.36*                   | 0.32* |       | 0.30*                 | 0.53* | 0.51* | 0.33*                    |       |       |                   |      |       |
| Ankle                    |                         |       |       | 0.34*                 | 0.47* | 0.90* | 0.38*                    | 0.48* |       |                   |      |       |
| Joint pROM scores        |                         |       |       |                       |       |       |                          |       |       |                   |      |       |
| Hip                      | 0.52*                   |       |       |                       |       |       |                          | 0.30* |       |                   |      |       |
| Knee                     |                         | 0.37* |       |                       |       |       |                          |       |       |                   |      |       |
| Ankle                    |                         |       |       |                       |       |       |                          |       |       | 0.30*             |      |       |
